# Supplementary material for: COVID-19 in hospitalized patients in 4 hospitals in San Isidro, Buenos Aires, Argentina
Source: bioRxiv or medRxiv preprint supplement (doi:10.1101/2021.07.30.21261220), 2021-08-14
Supplement: Supplementary file [file media-1.pdf]

**Tabla 1. Cases classified by hospital**

| Characteristic                      | H.C. San Isidro      | S. Las Lomas         | S. San Lucas         | S. Trinidad          | Total                |
|-------------------------------------|----------------------|----------------------|----------------------|----------------------|----------------------|
| Cases [num. (%)]                    | 326 (100)            | 110 (100)            | 77 (100)             | 155 (100)            | 668 (100)            |
| First occurrences                   | ...                  | ...                  | ...                  | ...                  | ...                  |
| ...Symptoms                         | 19/03/2020           | 14/03/2020           | 29/02/2020           | 12/03/2020           | 29/02/2020           |
| ...Admission                        | 08/11/2019           | 14/03/2020           | 05/03/2020           | 16/03/2020           | 08/11/2019           |
| ...Positive test                    | 30/03/2020           | 19/03/2020           | 12/03/2020           | 20/03/2020           | 12/03/2020           |
| Residence [num. (%)]                | Residence [num. (%)] | Residence [num. (%)] | Residence [num. (%)] | Residence [num. (%)] | Residence [num. (%)] |
| ...San Isidro district              | 317 (97.2)           | 33 (30.0)            | 25 (32.5)            | 4 (2.6)              | 379 (56.7)           |
| ...Other                            | 9 (2.8)              | 77 (70.0)            | 52 (67.5)            | 151 (97.4)           | 289 (43.3)           |
| Last condition [num. (%)]           | ...                  | ...                  | ...                  | ...                  | ...                  |
| ...Sick                             | 240 (73.6)           | 104 (94.5)           | 71 (92.2)            | 128 (82.6)           | 543 (81.3)           |
| ...Deceased                         | 63 (19.3)            | 6 (5.5)              | 0 (0.0)              | 14 (9.0)             | 83 (12.4)            |
| ...Recovered                        | 23 (7.1)             | 0 (0.0)              | 6 (7.8)              | 13 (8.4)             | 42 (6.3)             |
| ...Suspected                        | 0 (0.0)              | 0 (0.0)              | 0 (0.0)              | 0 (0.0)              | 0 (0.0)              |
| Intervals in days [mean (range)]    | ...                  | ...                  | ...                  | ...                  | ...                  |
| ...A: symptoms to IMV               | 11 (0-106)           | 7 (1-16)             | 13 (13-13)           | 12 (4-29)            | 11 (0-106)           |
| ...B: during IMV                    | 12 (0-40)            | 14 (13-16)           | –                    | 21 (4-63)            | 14 (0-63)            |
| ...C: admission to IMV              | 4 (0-16)             | 3 (0-6)              | 11 (11-11)           | 7 (0-25)             | 5 (0-25)             |
| ...D: admission to severe           | 3 (0-31)             | 2 (0-9)              | 4 (2-8)              | 3 (0-11)             | 3 (0-31)             |
| ...E: sick                          | 84 (0-199)           | 119 (5-225)          | 118 (7-227)          | 96 (1-209)           | 96 (0-227)           |
| ...G: severe                        | 20 (0-161)           | 15 (0-221)           | 3 (0-117)            | 21 (0-120)           | 17 (0-221)           |
| ...H: symptoms to severe            | 8 (0-105)            | 6 (0-19)             | 6 (4-9)              | 7 (2-17)             | 8 (0-105)            |
| ...I: in admission                  | 86 (1-266)           | 118 (5-230)          | 119 (12-229)         | 97 (4-213)           | 97 (1-266)           |
| ...J: symptoms to admission         | 5 (0-104)            | 5 (0-37)             | 3 (0-12)             | 5 (0-36)             | 5 (0-104)            |
| ...K: admission to symptoms         | 15 (1-135)           | 1 (1-1)              | 2 (2-2)              | 4 (1-6)              | 13 (1-135)           |
| ...M: deceased                      | 19 (0-191)           | 5 (0-113)            | 0 (0-0)              | 8 (0-209)            | 12 (0-209)           |
| ...P: severe to IMV                 | 0 (0-9)              | 0 (0-5)              | 0 (0-9)              | 0 (0-24)             | 0 (0-24)             |
| ...Q: end of IMV to discharged      | 1 (0-95)             | 0 (0-11)             | 0 (0-0)              | 0 (0-14)             | 0 (0-95)             |
| ...R: recovered                     | 11 (0-210)           | 0 (0-0)              | 16 (0-225)           | 16 (0-212)           | 11 (0-225)           |
| ...S: suspected                     | 5 (0-105)            | 3 (0-59)             | 3 (0-12)             | 5 (0-51)             | 5 (0-105)            |
| ...U: symptoms to hidrox.           | 12 (6-20)            | –                    | –                    | 9 (5-17)             | 10 (5-20)            |
| ...V: symptoms to antivirals        | 8 (5-11)             | –                    | 4 (4-4)              | 9 (6-17)             | 8 (4-17)             |
| ...W: symptoms to plasma            | 13 (1-106)           | –                    | 7 (7-7)              | 6 (3-15)             | 12 (1-106)           |
| ...Z: non severe in admission       | 10 (0-266)           | 7 (0-29)             | 10 (0-36)            | 7 (0-38)             | 9 (0-266)            |
| Age                                 | ...                  | ...                  | ...                  | ...                  | ...                  |
| ...median [IRQ]                     | 61 (48-75)           | 54 (44-67)           | 43 (33-53)           | 51 (40-64)           | 54 (43-70)           |
| ...range [min-mean-max]             | 15-60-95             | 19-57-98             | 22-45-76             | 16-53-98             | 15-56-98             |
| ...Quantiles [num. (%)]             | ...                  | ...                  | ...                  | ...                  | ...                  |
| .....<44                            | 66 (20.2)            | 22 (20.0)            | 39 (50.6)            | 52 (33.5)            | 179 (26.8)           |
| .....44-54                          | 56 (17.2)            | 36 (32.7)            | 22 (28.6)            | 42 (27.1)            | 156 (23.4)           |
| .....55-70                          | 88 (27.0)            | 33 (30.0)            | 12 (15.6)            | 33 (21.3)            | 166 (24.9)           |
| .....>70                            | 116 (35.6)           | 19 (17.3)            | 4 (5.2)              | 28 (18.1)            | 167 (25.0)           |
| ...10-year age intervals [num. (%)] | ...                  | ...                  | ...                  | ...                  | ...                  |
| .....0-10                           | 0 (0.0)              | 0 (0.0)              | 0 (0.0)              | 0 (0.0)              | 0 (0.0)              |
| .....10-20                          | 6 (1.8)              | 1 (0.9)              | 0 (0.0)              | 1 (0.6)              | 8 (1.2)              |
| .....20-30                          | 21 (6.4)             | 3 (2.7)              | 8 (10.4)             | 18 (11.6)            | 50 (7.5)             |
| .....30-40                          | 22 (6.7)             | 8 (7.3)              | 22 (28.6)            | 17 (11.0)            | 69 (10.3)            |
| .....40-50                          | 45 (13.8)            | 24 (21.8)            | 20 (26.0)            | 38 (24.5)            | 127 (19.0)           |
| .....50-60                          | 53 (16.3)            | 33 (30.0)            | 15 (19.5)            | 30 (19.4)            | 131 (19.6)           |
| .....60-70                          | 57 (17.5)            | 19 (17.3)            | 8 (10.4)             | 21 (13.5)            | 105 (15.7)           |
| .....70-80                          | 68 (20.9)            | 8 (7.3)              | 4 (5.2)              | 14 (9.0)             | 94 (14.1)            |
| .....80-90                          | 45 (13.8)            | 9 (8.2)              | 0 (0.0)              | 11 (7.1)             | 65 (9.7)             |
| .....90-100                         | 9 (2.8)              | 5 (4.5)              | 0 (0.0)              | 5 (3.2)              | 19 (2.8)             |

|                                          |             |            |            |            |             |
|------------------------------------------|-------------|------------|------------|------------|-------------|
| ...Female sex [num. (%)]                 | 134 (41.1)  | 50 (45.5)  | 38 (49.4)  | 63 (40.6)  | 285 (42.7)  |
| Fever on admission [num. (%)]            | ...         | ...        | ...        | ...        | ...         |
| ...fever detected                        | 194 (59.5)  | 90 (81.8)  | 51 (66.2)  | 112 (72.3) | 447 (66.9)  |
| .....Median temperature [°C (IQR)]       | 38 (38-38)  | 38 (38-38) | 38 (38-38) | 38 (38-38) | 38 (38-38)  |
| .....Ranges [min-max]                    | 30-40       | 37.4-40    | 36.5-39    | 37.5-39.2  | 30-40       |
| ...no fever detected                     | 125 (38.3)  | 18 (16.4)  | 21 (27.3)  | 43 (27.7)  | 207 (31.0)  |
| ...not specified                         | 0 (0.0)     | 0 (0.0)    | 0 (0.0)    | 0 (0.0)    | 0 (0.0)     |
| Symptoms [num. (%)]                      | ...         | ...        | ...        | ...        | ...         |
| ...Cough                                 | 177 (54.3)  | 53 (48.2)  | 44 (57.1)  | 107 (69.0) | 381 (57.0)  |
| ...Myalgia                               | 60 (18.4)   | 28 (25.5)  | 34 (44.2)  | 47 (30.3)  | 169 (25.3)  |
| ...Headache                              | 42 (12.9)   | 16 (14.5)  | 27 (35.1)  | 39 (25.2)  | 124 (18.6)  |
| ...Odynophagia                           | 53 (16.3)   | 18 (16.4)  | 28 (36.4)  | 41 (26.5)  | 140 (21.0)  |
| ...Rhinorrhoea                           | 3 (0.9)     | 7 (6.4)    | 7 (9.1)    | 3 (1.9)    | 20 (3.0)    |
| ...Diarrhoea                             | 14 (4.3)    | 11 (10.0)  | 7 (9.1)    | 18 (11.6)  | 50 (7.5)    |
| ...Dyspnoea                              | 117 (35.9)  | 37 (33.6)  | 7 (9.1)    | 44 (28.4)  | 205 (30.7)  |
| ...Anosmia                               | 30 (9.2)    | 10 (9.1)   | 17 (22.1)  | 28 (18.1)  | 85 (12.7)   |
| ...Fatigue                               | 34 (10.4)   | 11 (10.0)  | 1 (1.3)    | 0 (0.0)    | 46 (6.9)    |
| ...Malaise                               | 18 (5.5)    | 0 (0.0)    | 8 (10.4)   | 0 (0.0)    | 26 (3.9)    |
| ...Vomiting                              | 3 (0.9)     | 1 (0.9)    | 2 (2.6)    | 2 (1.3)    | 8 (1.2)     |
| ...Dysgeusia                             | 17 (5.2)    | 8 (7.3)    | 10 (13.0)  | 10 (6.5)   | 45 (6.7)    |
| ...Simultaneous symptoms [mean]          | 2.34 (0.7)  | 2.64 (2.4) | 3.16 (4.1) | 2.91 (1.9) | 2.61 (0.4)  |
| ...One symptom only                      | 60 (18.4)   | 17 (15.5)  | 7 (9.1)    | 17 (11.0)  | 101 (15.1)  |
| Comorbidities [num. (%)]                 | ...         | ...        | ...        | ...        | ...         |
| ...DBT                                   | 73 (22.4)   | 15 (13.6)  | 3 (3.9)    | 23 (14.8)  | 114 (17.1)  |
| ...HTA                                   | 138 (42.3)  | 33 (30.0)  | 14 (18.2)  | 36 (23.2)  | 221 (33.1)  |
| ...IECA                                  | 56 (17.2)   | 6 (5.5)    | 5 (6.5)    | 7 (4.5)    | 74 (11.1)   |
| ...ARB                                   | 43 (13.2)   | 20 (18.2)  | 7 (9.1)    | 14 (9.0)   | 84 (12.6)   |
| ...Chronic kidney disease                | 25 (7.7)    | 0 (0.0)    | 0 (0.0)    | 5 (3.2)    | 30 (4.5)    |
| ...COPD                                  | 9 (2.8)     | 5 (4.5)    | 0 (0.0)    | 4 (2.6)    | 18 (2.7)    |
| ...Asthma                                | 17 (5.2)    | 2 (1.8)    | 5 (6.5)    | 6 (3.9)    | 30 (4.5)    |
| ...Cardiovascular disease                | 64 (19.6)   | 7 (6.4)    | 3 (3.9)    | 14 (9.0)   | 88 (13.2)   |
| ...Lung disease                          | 10 (3.1)    | 5 (4.5)    | 1 (1.3)    | 4 (2.6)    | 20 (3.0)    |
| ...Cancer                                | 15 (4.6)    | 3 (2.7)    | 0 (0.0)    | 8 (5.2)    | 26 (3.9)    |
| ...Current smoker                        | 15 (4.6)    | 4 (3.6)    | 10 (13.0)  | 3 (1.9)    | 32 (4.8)    |
| ...former smoker                         | 71 (21.8)   | 1 (0.9)    | 9 (11.7)   | 8 (5.2)    | 89 (13.3)   |
| ...Never smoked                          | 234 (71.8)  | 90 (81.8)  | 52 (67.5)  | 142 (91.6) | 518 (77.5)  |
| ...Chronic liver disease                 | 5 (1.5)     | 1 (0.9)    | 0 (0.0)    | 0 (0.0)    | 6 (0.9)     |
| ...Immunosuppressive drugs               | 13 (4.0)    | 4 (3.6)    | 1 (1.3)    | 7 (4.5)    | 25 (3.7)    |
| ...Pregnancy                             | 6 (1.8)     | 0 (0.0)    | 2 (2.6)    | 2 (1.3)    | 10 (1.5)    |
| ...HIV                                   | 3 (0.9)     | 0 (0.0)    | 0 (0.0)    | 0 (0.0)    | 3 (0.4)     |
| ...Obesity                               | 6 (1.8)     | 0 (0.0)    | 0 (0.0)    | 15 (9.7)   | 21 (3.1)    |
| ...Simultaneous comorbidities [mean]     | 1.75        | 0.96       | 0.78       | 1.01       | 1.33        |
| ...Without comorbidities [num. (%)]      | 89 (27.3)   | 62 (56.4)  | 42 (54.5)  | 76 (49.0)  | 269 (40.3)  |
| ...Without comorbidities younger than 70 | 64 (19.6)   | 54 (49.1)  | 40 (51.9)  | 69 (44.5)  | 227 (34.0)  |
| Epidemiology [num. (%)]                  | ...         | ...        | ...        | ...        | ...         |
| ...Travel                                | 0 (0.0)     | 2 (1.8)    | 6 (7.8)    | 6 (3.9)    | 14 (2.1)    |
| ...Direct contact                        | 76 (23.3)   | 35 (31.8)  | 20 (26.0)  | 43 (27.7)  | 174 (26.0)  |
| ...Health personnel                      | 7 (2.1)     | 9 (8.2)    | 19 (24.7)  | 21 (13.5)  | 56 (8.4)    |
| Radiologic findings [num. (%)]           | ...         | ...        | ...        | ...        | ...         |
| ...Chest X-Ray 1                         | 158 (100.0) | 3 (100.0)  | 11 (100.0) | 35 (100.0) | 207 (100.0) |
| .....1. normal                           | 63 (39.9)   | 1 (33.3)   | 9 (81.8)   | 28 (80.0)  | 101 (48.8)  |
| .....2. alveolar ground-glass            | 27 (17.1)   | 1 (33.3)   | 0 (0.0)    | 3 (8.6)    | 31 (15.0)   |
| .....3. multifocal                       | 22 (13.9)   | 0 (0.0)    | 0 (0.0)    | 2 (5.7)    | 24 (11.6)   |
| .....4. ground-glass opacities           | 45 (28.5)   | 1 (33.3)   | 2 (18.2)   | 2 (5.7)    | 50 (24.2)   |
| .....5. other                            | 1 (0.6)     | 0 (0.0)    | 0 (0.0)    | 0 (0.0)    | 1 (0.5)     |
| ...Chest X-Ray 2                         | 11 (100.0)  | 2 (100.0)  | 4 (100.0)  | 7 (100.0)  | 24 (100.0)  |

|                                |                        |                        |                        |                        |                        |
|--------------------------------|------------------------|------------------------|------------------------|------------------------|------------------------|
| .....1. normal                 | 0 (0.0)                | 0 (0.0)                | 0 (0.0)                | 2 (28.6)               | 2 (8.3)                |
| .....2. alveolar segmento      | 0 (0.0)                | 0 (0.0)                | 0 (0.0)                | 0 (0.0)                | 0 (0.0)                |
| .....3. multifocal             | 0 (0.0)                | 1 (50.0)               | 0 (0.0)                | 0 (0.0)                | 1 (4.2)                |
| .....4. ground-glass opacities | 10 (90.9)              | 1 (50.0)               | 2 (50.0)               | 5 (71.4)               | 18 (75.0)              |
| .....5. other                  | 1 (9.1)                | 0 (0.0)                | 2 (50.0)               | 0 (0.0)                | 3 (12.5)               |
| ...Chest CT 1                  | 241 (100.0)            | 108 (100.0)            | 64 (100.0)             | 129 (100.0)            | 542 (100.0)            |
| .....1. normal                 | 35 (14.5)              | 14 (13.0)              | 22 (34.4)              | 20 (15.5)              | 91 (16.8)              |
| .....2. alveolar segmento      | 15 (6.2)               | 9 (8.3)                | 0 (0.0)                | 10 (7.8)               | 34 (6.3)               |
| .....3. multifocal             | 19 (7.9)               | 2 (1.9)                | 7 (10.9)               | 44 (34.1)              | 72 (13.3)              |
| .....4. ground-glass opacities | 167 (69.3)             | 77 (71.3)              | 35 (54.7)              | 52 (40.3)              | 331 (61.1)             |
| .....5. other                  | 5 (2.1)                | 6 (5.6)                | 0 (0.0)                | 3 (2.3)                | 14 (2.6)               |
| ...Chest CT 2                  | 43 (100.0)             | 3 (100.0)              | 1 (100.0)              | 8 (100.0)              | 55 (100.0)             |
| .....1. normal                 | 1 (2.3)                | 0 (0.0)                | 0 (0.0)                | 1 (12.5)               | 2 (3.6)                |
| .....2. alveolar segmento      | 0 (0.0)                | 0 (0.0)                | 0 (0.0)                | 0 (0.0)                | 0 (0.0)                |
| .....3. multifocal             | 0 (0.0)                | 0 (0.0)                | 0 (0.0)                | 1 (12.5)               | 1 (1.8)                |
| .....4. ground-glass opacities | 41 (95.3)              | 3 (100.0)              | 1 (100.0)              | 6 (75.0)               | 51 (92.7)              |
| .....5. other                  | 1 (2.3)                | 0 (0.0)                | 0 (0.0)                | 0 (0.0)                | 1 (1.8)                |
| ...Chest X-Ray 1               | ...                    | ...                    | ...                    | ...                    | ...                    |
| .....plus chest CT 1           | 8 (12.7)               | 0 (0.0)                | 3 (33.3)               | 6 (21.4)               | 17 (16.8)              |
| .....plus chest CT 2           | 0 (0.0)                | 0 (0.0)                | 0 (0.0)                | 0 (0.0)                | 0 (0.0)                |
| .....plus chest CT 3           | 3 (4.8)                | 0 (0.0)                | 0 (0.0)                | 0 (0.0)                | 3 (3.0)                |
| .....plus chest CT 4           | 7 (11.1)               | 0 (0.0)                | 2 (22.2)               | 0 (0.0)                | 9 (8.9)                |
| .....plus chest CT 5           | 0 (0.0)                | 0 (0.0)                | 0 (0.0)                | 0 (0.0)                | 0 (0.0)                |
| Laboratory results [num. (%)]  | ...                    | ...                    | ...                    | ...                    | ...                    |
| ..... [median (IQR)]           | ...                    | ...                    | ...                    | ...                    | ...                    |
| ...Lymphocyte count            | 323 (100.0)            | 110 (100.0)            | 68 (100.0)             | 109 (100.0)            | 610 (100.0)            |
| .....                          | 1369 (995-1827)        | 1140 (837-1620)        | 1300 (975-1700)        | 1537 (952-1938)        | 1336 (936-1796)        |
| .....Lymphocyte <1,500         | 184 (57.0)             | 80 (72.7)              | 40 (58.8)              | 51 (46.8)              | 355 (58.2)             |
| ...White-cell count            | 324 (100.0)            | 94 (100.0)             | 70 (100.0)             | 155 (100.0)            | 643 (100.0)            |
| .....                          | 6900 (5100-9625)       | 5300 (4400-7200)       | 4900 (3925-5900)       | 5600 (4300-6700)       | 5900 (4600-8000)       |
| ..... <4,500                   | 48 (14.8)              | 26 (27.7)              | 25 (35.7)              | 44 (28.4)              | 143 (22.2)             |
| ..... >10,000                  | 73 (22.5)              | 6 (6.4)                | 1 (1.4)                | 12 (7.7)               | 92 (14.3)              |
| ...Platelet                    | 324 (100.0)            | 94 (100.0)             | 69 (100.0)             | 155 (100.0)            | 642 (100.0)            |
| .....                          | 211800 (164675-278500) | 183000 (146250-231750) | 191000 (173000-228000) | 219000 (175500-264500) | 207050 (166000-257750) |
| ..... <150,000                 | 58 (17.9)              | 26 (27.7)              | 6 (8.7)                | 14 (9.0)               | 104 (16.2)             |
| ...ESR                         | 206 (100.0)            | 80 (100.0)             | 54 (100.0)             | 29 (100.0)             | 369 (100.0)            |
| .....                          | 47 (27-72)             | 28 (16-41)             | 20 (10-40)             | 36 (15-78)             | 37 (20-63)             |
| ..... >50                      | 93 (45.1)              | 15 (18.8)              | 7 (13.0)               | 11 (37.9)              | 126 (34.1)             |
| ...Creatinine                  | 323 (100.0)            | 109 (100.0)            | 69 (100.0)             | 151 (100.0)            | 652 (100.0)            |
| .....                          | 1 (1-1)                | 1 (1-1)                | 1 (1-1)                | 1 (1-1)                | 1 (1-1)                |
| ..... >1.20                    | 53 (16.4)              | 12 (11.0)              | 2 (2.9)                | 16 (10.6)              | 83 (12.7)              |
| ...Lactate dehydrogenase       | 314 (100.0)            | 100 (100.0)            | 59 (100.0)             | 90 (100.0)             | 563 (100.0)            |
| .....                          | 434 (321-650)          | 184 (156-236)          | 186 (154-222)          | 354 (295-461)          | 340 (228-532)          |
| ..... >400                     | 182 (58.0)             | 4 (4.0)                | 1 (1.7)                | 36 (40.0)              | 223 (39.6)             |
| ..... >600                     | 100 (31.8)             | 0 (0.0)                | 0 (0.0)                | 5 (5.6)                | 105 (18.7)             |
| ...C-reactive protein          | 177 (100.0)            | 98 (100.0)             | 44 (100.0)             | 123 (100.0)            | 442 (100.0)            |
| .....                          | 50 (13-113)            | 21 (12-62)             | 6 (3-16)               | 15 (5-41)              | 23 (7-73)              |
| ..... >10                      | 136 (76.8)             | 76 (77.6)              | 16 (36.4)              | 73 (59.3)              | 301 (68.1)             |
| ..... >60                      | 82 (46.3)              | 25 (25.5)              | 2 (4.5)                | 23 (18.7)              | 132 (29.9)             |
| ..... >100                     | 59 (33.3)              | 12 (12.2)              | 1 (2.3)                | 10 (8.1)               | 82 (18.6)              |
| ...Ferritin                    | 221 (100.0)            | 69 (100.0)             | 32 (100.0)             | 99 (100.0)             | 421 (100.0)            |
| .....                          | 612 (281-1607)         | 342 (197-627)          | 277 (125-537)          | 651 (258-1423)         | 514 (231-1152)         |
| ..... >500                     | 125 (56.6)             | 26 (37.7)              | 8 (25.0)               | 58 (58.6)              | 217 (51.5)             |
| ..... >600                     | 112 (50.7)             | 21 (30.4)              | 8 (25.0)               | 51 (51.5)              | 192 (45.6)             |
| ...Bilirubin                   | 297 (100.0)            | 107 (100.0)            | 63 (100.0)             | 136 (100.0)            | 603 (100.0)            |
| .....                          | 1 (0-1)                | 0 (0-1)                | 0 (0-1)                | 0 (0-1)                | 0 (0-1)                |
| ...Alanine aminotransferase    | 324 (100.0)            | 107 (100.0)            | 64 (100.0)             | 136 (100.0)            | 631 (100.0)            |
| .....                          | 33 (20-58)             | 23 (13-34)             | 23 (16-42)             | 28 (17-41)             | 28 (17-48)             |

|                                |             |             |            |             |             |
|--------------------------------|-------------|-------------|------------|-------------|-------------|
| ..... >41                      | 124 (38.3)  | 21 (19.6)   | 17 (26.6)  | 34 (25.0)   | 196 (31.1)  |
| ...Aspartate aminotransferase  | 322 (100.0) | 107 (100.0) | 64 (100.0) | 136 (100.0) | 629 (100.0) |
| <- <-                          | 34 (23-52)  | 23 (18-34)  | 25 (21-33) | 26 (20-36)  | 29 (21-44)  |
| ..... >40                      | 126 (39.1)  | 20 (18.7)   | 7 (10.9)   | 25 (18.4)   | 178 (28.3)  |
| ...Procalcitonin               | 0 (0.0)     | 1 (100.0)   | 3 (100.0)  | 2 (100.0)   | 6 (100.0)   |
| <- <-                          | -           | 0 (0-0)     | 0 (0-0)    | 0 (0-0)     | 0 (0-0)     |
| ...D-dimer                     | 9 (100.0)   | 55 (100.0)  | 57 (100.0) | 95 (100.0)  | 216 (100.0) |
| .....                          | 1 (1-1)     | 0 (0-0)     | 0 (0-0)    | 1 (0-1)     | 0 (0-1)     |
| ...3 normal biomarkers         | 3 (0.9)     | 2 (1.8)     | 8 (10.4)   | 1 (0.6)     | 14 (2.1)    |
| Treatements [num. (%)]         | ...         | ...         | ...        | ...         | ...         |
| ...With hidroxychloroquine     | 5 (1.5)     | 1 (0.9)     | 2 (2.6)    | 10 (6.5)    | 18 (2.7)    |
| .....With IMV                  | 1 (20.0)    | 1 (100.0)   | 1 (50.0)   | 3 (30.0)    | 6 (33.3)    |
| .....deceased                  | 1 (20.0)    | 0 (0.0)     | 0 (0.0)    | 1 (10.0)    | 2 (11.1)    |
| ...Without hidroxychloroquine  | 321 (98.5)  | 109 (99.1)  | 75 (97.4)  | 145 (93.5)  | 650 (97.3)  |
| .....With IMV                  | 31 (9.7)    | 3 (2.8)     | 0 (0.0)    | 9 (6.2)     | 43 (6.6)    |
| .....deceased                  | 62 (19.3)   | 6 (5.5)     | 0 (0.0)    | 13 (9.0)    | 81 (12.5)   |
| ...With lopinavir/ritonavir    | 8 (2.5)     | 1 (0.9)     | 3 (3.9)    | 7 (4.5)     | 19 (2.8)    |
| .....With IMV                  | 2 (25.0)    | 1 (100.0)   | 1 (33.3)   | 3 (42.9)    | 7 (36.8)    |
| .....deceased                  | 3 (37.5)    | 0 (0.0)     | 0 (0.0)    | 1 (14.3)    | 4 (21.1)    |
| ...Without lopinavir/ritonavir | 318 (97.5)  | 109 (99.1)  | 74 (96.1)  | 148 (95.5)  | 649 (97.2)  |
| .....With IMV                  | 30 (9.4)    | 3 (2.8)     | 0 (0.0)    | 9 (6.1)     | 42 (6.5)    |
| .....deceased                  | 60 (18.9)   | 6 (5.5)     | 0 (0.0)    | 13 (8.8)    | 79 (12.2)   |
| ...With plasma                 | 35 (10.7)   | 1 (0.9)     | 1 (1.3)    | 8 (5.2)     | 45 (6.7)    |
| .....With IMV                  | 11 (31.4)   | 0 (0.0)     | 0 (0.0)    | 2 (25.0)    | 13 (28.9)   |
| .....deceased                  | 6 (17.1)    | 0 (0.0)     | 0 (0.0)    | 1 (12.5)    | 7 (15.6)    |
| ...Without plasma              | 291 (89.3)  | 109 (99.1)  | 76 (98.7)  | 147 (94.8)  | 623 (93.3)  |
| .....With IMV                  | 21 (7.2)    | 4 (3.7)     | 1 (1.3)    | 10 (6.8)    | 36 (5.8)    |
| .....deceased                  | 57 (19.6)   | 6 (5.5)     | 0 (0.0)    | 13 (8.8)    | 76 (12.2)   |
| ...With azithromycin           | 225 (69.0)  | 79 (71.8)   | 37 (48.1)  | 42 (27.1)   | 383 (57.3)  |
| .....With IMV                  | 22 (9.8)    | 4 (5.1)     | 0 (0.0)    | 6 (14.3)    | 32 (8.4)    |
| .....deceased                  | 40 (17.8)   | 3 (3.8)     | 0 (0.0)    | 4 (9.5)     | 47 (12.3)   |
| ...Without azithromycin        | 101 (31.0)  | 31 (28.2)   | 40 (51.9)  | 113 (72.9)  | 285 (42.7)  |
| .....With IMV                  | 10 (9.9)    | 0 (0.0)     | 1 (2.5)    | 6 (5.3)     | 17 (6.0)    |
| .....deceased                  | 23 (22.8)   | 3 (9.7)     | 0 (0.0)    | 10 (8.8)    | 36 (12.6)   |
| ...With steroids               | 114 (35.0)  | 37 (33.6)   | 8 (10.4)   | 41 (26.5)   | 200 (29.9)  |
| .....With IMV                  | 24 (21.1)   | 3 (8.1)     | 0 (0.0)    | 9 (22.0)    | 36 (18.0)   |
| .....deceased                  | 33 (28.9)   | 3 (8.1)     | 0 (0.0)    | 7 (17.1)    | 43 (21.5)   |
| ...Without steroids            | 212 (65.0)  | 73 (66.4)   | 69 (89.6)  | 114 (73.5)  | 468 (70.1)  |
| .....With IMV                  | 8 (3.8)     | 1 (1.4)     | 1 (1.4)    | 3 (2.6)     | 13 (2.8)    |
| .....deceased                  | 30 (14.2)   | 3 (4.1)     | 0 (0.0)    | 7 (6.1)     | 40 (8.5)    |
| Evolution [num. (%)]           | ...         | ...         | ...        | ...         | ...         |
| ...Temperature >38             | 27 (8.3)    | 31 (28.2)   | 1 (1.3)    | 20 (12.9)   | 79 (11.8)   |
| ...RR >30?                     | 47 (14.4)   | 2 (1.8)     | 2 (2.6)    | 11 (7.1)    | 62 (9.3)    |
| <- SAT <93?                    | 101 (31.0)  | 9 (8.2)     | 3 (3.9)    | 39 (25.2)   | 152 (22.8)  |
| ...IMV                         | 32 (9.8)    | 4 (3.6)     | 1 (1.3)    | 12 (7.7)    | 49 (7.3)    |
| ...NIV                         | 0 (0.0)     | 1 (0.9)     | 2 (2.6)    | 0 (0.0)     | 3 (0.4)     |
| ...infiltrados <48 hs          | 21 (6.4)    | 3 (2.7)     | 1 (1.3)    | 9 (5.8)     | 34 (5.1)    |
| ...Altered conciousness        | 15 (4.6)    | 1 (0.9)     | 0 (0.0)    | 0 (0.0)     | 16 (2.4)    |
| ...Hemodynamic instability     | 17 (5.2)    | 1 (0.9)     | 0 (0.0)    | 4 (2.6)     | 22 (3.3)    |
| ...CURB >=2                    | 6 (1.8)     | 1 (0.9)     | 1 (1.3)    | 5 (3.2)     | 13 (1.9)    |
| ...ICU admission               | 50 (15.3)   | 9 (8.2)     | 4 (5.2)    | 14 (9.0)    | 77 (11.5)   |
| ...IMV prone position          | 17 (5.2)    | 1 (0.9)     | 1 (1.3)    | 2 (1.3)     | 21 (3.1)    |
| ...Haemodialysis               | 0 (0.0)     | 0 (0.0)     | 0 (0.0)    | 0 (0.0)     | 0 (0.0)     |
| ...Arrhythmia                  | 4 (1.2)     | 0 (0.0)     | 0 (0.0)    | 0 (0.0)     | 4 (0.6)     |
| ...Myocarditis/IM              | 0 (0.0)     | 0 (0.0)     | 0 (0.0)    | 0 (0.0)     | 0 (0.0)     |
| ...Inotropic agents            | 16 (4.9)    | 0 (0.0)     | 0 (0.0)    | 2 (1.3)     | 18 (2.7)    |

**Tabla 2. Cases classified into private and public hospital admission**

| Characteristic                      | Public               | Private              | Total                |
|-------------------------------------|----------------------|----------------------|----------------------|
| Cases [num. (%)]                    | 326 (100)            | 342 (100)            | 668 (100)            |
| First occurrences                   | ...                  | ...                  | ...                  |
| ...Symptoms                         | 19/03/2020           | 29/02/2020           | 29/02/2020           |
| ...Admission                        | 08/11/2019           | 05/03/2020           | 08/11/2019           |
| ...Positive test                    | 30/03/2020           | 12/03/2020           | 12/03/2020           |
| Residence [num. (%)]                | Residence [num. (%)] | Residence [num. (%)] | Residence [num. (%)] |
| ...San Isidro district              | 317 (97.2)           | 62 (18.1)            | 379 (56.7)           |
| ...Other                            | 9 (2.8)              | 280 (81.9)           | 289 (43.3)           |
| Last condition [num. (%)]           | ...                  | ...                  | ...                  |
| ...Sick                             | 240 (73.6)           | 303 (88.6)           | 543 (81.3)           |
| ...Deceased                         | 63 (19.3)            | 20 (5.8)             | 83 (12.4)            |
| ...Recovered                        | 23 (7.1)             | 19 (5.6)             | 42 (6.3)             |
| ...Suspected                        | 0 (0.0)              | 0 (0.0)              | 0 (0.0)              |
| Intervals in days [mean (range)]    | ...                  | ...                  | ...                  |
| ...A: symptoms to IMV               | 11 (0-106)           | 11 (1-29)            | 11 (0-106)           |
| ...B: during IMV                    | 12 (0-40)            | 20 (4-63)            | 14 (0-63)            |
| ...C: admission to IMV              | 4 (0-16)             | 6 (0-25)             | 5 (0-25)             |
| ...D: admission to severe           | 3 (0-31)             | 3 (0-11)             | 3 (0-31)             |
| ...E: sick                          | 84 (0-199)           | 108 (1-227)          | 96 (0-227)           |
| ...G: severe                        | 20 (0-161)           | 15 (0-221)           | 17 (0-221)           |
| ...H: symptoms to severe            | 8 (0-105)            | 7 (0-19)             | 8 (0-105)            |
| ...I: in admission                  | 86 (1-266)           | 108 (4-230)          | 97 (1-266)           |
| ...J: symptoms to admission         | 5 (0-104)            | 4 (0-37)             | 5 (0-104)            |
| ...K: admission to symptoms         | 15 (1-135)           | 3 (1-6)              | 13 (1-135)           |
| ...M: deceased                      | 19 (0-191)           | 5 (0-209)            | 12 (0-209)           |
| ...P: severe to IMV                 | 0 (0-9)              | 0 (0-24)             | 0 (0-24)             |
| ...Q: end of IMV to discharged      | 1 (0-95)             | 0 (0-14)             | 0 (0-95)             |
| ...R: recovered                     | 11 (0-210)           | 11 (0-225)           | 11 (0-225)           |
| ...S: suspected                     | 5 (0-105)            | 4 (0-59)             | 5 (0-105)            |
| ...U: symptoms to hidrox.           | 12 (6-20)            | 9 (5-17)             | 10 (5-20)            |
| ...V: symptoms to antivirals        | 8 (5-11)             | 9 (4-17)             | 8 (4-17)             |
| ...W: symptoms to plasma            | 13 (1-106)           | 7 (3-15)             | 12 (1-106)           |
| ...Z: non severe in admission       | 10 (0-266)           | 8 (0-38)             | 9 (0-266)            |
| Age                                 | ...                  | ...                  | ...                  |
| ...median [IRQ]                     | 61 (48-75)           | 50 (40-63)           | 54 (43-70)           |
| ...range [min-mean-max]             | 15-60-95             | 16-52-98             | 15-56-98             |
| ...Quantiles [num. (%)]             | ...                  | ...                  | ...                  |
| .....<44                            | 66 (20.2)            | 113 (33.0)           | 179 (26.8)           |
| .....44-54                          | 56 (17.2)            | 100 (29.2)           | 156 (23.4)           |
| .....55-70                          | 88 (27.0)            | 78 (22.8)            | 166 (24.9)           |
| .....>70                            | 116 (35.6)           | 51 (14.9)            | 167 (25.0)           |
| ...10-year age intervals [num. (%)] | ...                  | ...                  | ...                  |
| .....0-10                           | 0 (0.0)              | 0 (0.0)              | 0 (0.0)              |
| .....10-20                          | 6 (1.8)              | 2 (0.6)              | 8 (1.2)              |
| .....20-30                          | 21 (6.4)             | 29 (8.5)             | 50 (7.5)             |
| .....30-40                          | 22 (6.7)             | 47 (13.7)            | 69 (10.3)            |
| .....40-50                          | 45 (13.8)            | 82 (24.0)            | 127 (19.0)           |
| .....50-60                          | 53 (16.3)            | 78 (22.8)            | 131 (19.6)           |
| .....60-70                          | 57 (17.5)            | 48 (14.0)            | 105 (15.7)           |
| .....70-80                          | 68 (20.9)            | 26 (7.6)             | 94 (14.1)            |
| .....80-90                          | 45 (13.8)            | 20 (5.8)             | 65 (9.7)             |
| .....90-100                         | 9 (2.8)              | 10 (2.9)             | 19 (2.8)             |
| ...Female sex [num. (%)]            | 134 (41.1)           | 151 (44.2)           | 285 (42.7)           |

|                                           |             |            |             |
|-------------------------------------------|-------------|------------|-------------|
| Fever on admission [num. (%)]             | ...         | ...        | ...         |
| ...fever detected                         | 194 (59.5)  | 253 (74.0) | 447 (66.9)  |
| .....Median temperature [°C (IQR)]        | 38 (38-38)  | 38 (38-38) | 38 (38-38)  |
| .....Ranges [min-max]                     | 30-40       | 36.5-40    | 30-40       |
| ...no fever detected                      | 125 (38.3)  | 82 (24.0)  | 207 (31.0)  |
| ...not specified                          | 0 (0.0)     | 0 (0.0)    | 0 (0.0)     |
| Symptoms [num. (%)]                       | ...         | ...        | ...         |
| ...Cough                                  | 177 (54.3)  | 204 (59.6) | 381 (57.0)  |
| ...Myalgia                                | 60 (18.4)   | 109 (31.9) | 169 (25.3)  |
| ...Headache                               | 42 (12.9)   | 82 (24.0)  | 124 (18.6)  |
| ...Odynophagia                            | 53 (16.3)   | 87 (25.4)  | 140 (21.0)  |
| ...Rhinorrhoea                            | 3 (0.9)     | 17 (5.0)   | 20 (3.0)    |
| ...Diarrhoea                              | 14 (4.3)    | 36 (10.5)  | 50 (7.5)    |
| ...Dyspnoea                               | 117 (35.9)  | 88 (25.7)  | 205 (30.7)  |
| ...Anosmia                                | 30 (9.2)    | 55 (16.1)  | 85 (12.7)   |
| ...Fatigue                                | 34 (10.4)   | 12 (3.5)   | 46 (6.9)    |
| ...Malaise                                | 18 (5.5)    | 8 (2.3)    | 26 (3.9)    |
| ...Vomiting                               | 3 (0.9)     | 5 (1.5)    | 8 (1.2)     |
| ...Dysgeusia                              | 17 (5.2)    | 28 (8.2)   | 45 (6.7)    |
| ...Simultaneous symptoms [mean]           | 2.34 (0.7)  | 2.88 (0.8) | 2.61 (0.4)  |
| ...One symptom only                       | 60 (18.4)   | 41 (12.0)  | 101 (15.1)  |
| Comorbidities [num. (%)]                  | ...         | ...        | ...         |
| ...DBT                                    | 73 (22.4)   | 41 (12.0)  | 114 (17.1)  |
| ...HTA                                    | 138 (42.3)  | 83 (24.3)  | 221 (33.1)  |
| ...IECA                                   | 56 (17.2)   | 18 (5.3)   | 74 (11.1)   |
| ...ARB                                    | 43 (13.2)   | 41 (12.0)  | 84 (12.6)   |
| ...Chronic kidney disease                 | 25 (7.7)    | 5 (1.5)    | 30 (4.5)    |
| ...COPD                                   | 9 (2.8)     | 9 (2.6)    | 18 (2.7)    |
| ...Asthma                                 | 17 (5.2)    | 13 (3.8)   | 30 (4.5)    |
| ...Cardiovascular disease                 | 64 (19.6)   | 24 (7.0)   | 88 (13.2)   |
| ...Lung disease                           | 10 (3.1)    | 10 (2.9)   | 20 (3.0)    |
| ...Cancer                                 | 15 (4.6)    | 11 (3.2)   | 26 (3.9)    |
| ...Current smoker                         | 15 (4.6)    | 17 (5.0)   | 32 (4.8)    |
| ...former smoker                          | 71 (21.8)   | 18 (5.3)   | 89 (13.3)   |
| ...Never smoked                           | 234 (71.8)  | 284 (83.0) | 518 (77.5)  |
| ...Chronic liver disease                  | 5 (1.5)     | 1 (0.3)    | 6 (0.9)     |
| ...Immunosuppressive drugs                | 13 (4.0)    | 12 (3.5)   | 25 (3.7)    |
| ...Pregnancy                              | 6 (1.8)     | 4 (1.2)    | 10 (1.5)    |
| ...HIV                                    | 3 (0.9)     | 0 (0.0)    | 3 (0.4)     |
| ...Obesity                                | 6 (1.8)     | 15 (4.4)   | 21 (3.1)    |
| ...Simultaneous comorbidities [mean]      | 1.75        | 0.94       | 1.33        |
| ...Whithout comorbidities [num. (%)]      | 89 (27.3)   | 180 (52.6) | 269 (40.3)  |
| ...Whithout comorbidities younger than 70 | 64 (19.6)   | 163 (47.7) | 227 (34.0)  |
| Epidemiology [num. (%)]                   | ...         | ...        | ...         |
| ...Travel                                 | 0 (0.0)     | 14 (4.1)   | 14 (2.1)    |
| ...Direct contact                         | 76 (23.3)   | 98 (28.7)  | 174 (26.0)  |
| ...Health personnel                       | 7 (2.1)     | 49 (14.3)  | 56 (8.4)    |
| Radiologic findings [num. (%)]            | ...         | ...        | ...         |
| ...Chest X-Ray 1                          | 158 (100.0) | 49 (100.0) | 207 (100.0) |
| .....1. normal                            | 63 (39.9)   | 38 (77.6)  | 101 (48.8)  |
| .....2. alveolar ground-glass             | 27 (17.1)   | 4 (8.2)    | 31 (15.0)   |
| .....3. multifocal                        | 22 (13.9)   | 2 (4.1)    | 24 (11.6)   |
| .....4. ground-glass opacities            | 45 (28.5)   | 5 (10.2)   | 50 (24.2)   |
| .....5. other                             | 1 (0.6)     | 0 (0.0)    | 1 (0.5)     |
| ...Chest X-Ray 2                          | 11 (100.0)  | 13 (100.0) | 24 (100.0)  |
| .....1. normal                            | 0 (0.0)     | 2 (15.4)   | 2 (8.3)     |
| .....2. alveolar segmento                 | 0 (0.0)     | 0 (0.0)    | 0 (0.0)     |
| .....3. multifocal                        | 0 (0.0)     | 1 (7.7)    | 1 (4.2)     |
| .....4. ground-glass opacities            | 10 (90.9)   | 8 (61.5)   | 18 (75.0)   |

|                                |                        |                       |                        |
|--------------------------------|------------------------|-----------------------|------------------------|
| .....5. other                  | 1 (9.1)                | 2 (15.4)              | 3 (12.5)               |
| ...Chest CT 1                  | 241 (100.0)            | 301 (100.0)           | 542 (100.0)            |
| .....1. normal                 | 35 (14.5)              | 56 (18.6)             | 91 (16.8)              |
| .....2. alveolar segmento      | 15 (6.2)               | 19 (6.3)              | 34 (6.3)               |
| .....3. multifocal             | 19 (7.9)               | 53 (17.6)             | 72 (13.3)              |
| .....4. ground-glass opacities | 167 (69.3)             | 164 (54.5)            | 331 (61.1)             |
| .....5. other                  | 5 (2.1)                | 9 (3.0)               | 14 (2.6)               |
| ...Chest CT 2                  | 43 (100.0)             | 12 (100.0)            | 55 (100.0)             |
| .....1. normal                 | 1 (2.3)                | 1 (8.3)               | 2 (3.6)                |
| .....2. alveolar segmento      | 0 (0.0)                | 0 (0.0)               | 0 (0.0)                |
| .....3. multifocal             | 0 (0.0)                | 1 (8.3)               | 1 (1.8)                |
| .....4. ground-glass opacities | 41 (95.3)              | 10 (83.3)             | 51 (92.7)              |
| .....5. other                  | 1 (2.3)                | 0 (0.0)               | 1 (1.8)                |
| ...Chest X-Ray 1               | ...                    | ...                   | ...                    |
| .....plus chest CT 1           | 8 (12.7)               | 9 (23.7)              | 17 (16.8)              |
| .....plus chest CT 2           | 0 (0.0)                | 0 (0.0)               | 0 (0.0)                |
| .....plus chest CT 3           | 3 (4.8)                | 0 (0.0)               | 3 (3.0)                |
| .....plus chest CT 4           | 7 (11.1)               | 2 (5.3)               | 9 (8.9)                |
| .....plus chest CT 5           | 0 (0.0)                | 0 (0.0)               | 0 (0.0)                |
| Laboratory results [num. (%)]  | ...                    | ...                   | ...                    |
| ..... [median (IQR)]           | ...                    | ...                   | ...                    |
| ...Lymphocyte count            | 323 (100.0)            | 287 (100.0)           | 610 (100.0)            |
| .....                          | 1369 (995-1827)        | 1302 (893-1768)       | 1336 (936-1796)        |
| .....Lymphocyte <1,500         | 184 (57.0)             | 171 (59.6)            | 355 (58.2)             |
| ...White-cell count            | 324 (100.0)            | 319 (100.0)           | 643 (100.0)            |
| .....                          | 6900 (5100-9625)       | 5300 (4200-6450)      | 5900 (4600-8000)       |
| ..... <4,500                   | 48 (14.8)              | 95 (29.8)             | 143 (22.2)             |
| ..... >10,000                  | 73 (22.5)              | 19 (6.0)              | 92 (14.3)              |
| ...Platelet                    | 324 (100.0)            | 318 (100.0)           | 642 (100.0)            |
| .....                          | 211800 (164675-278500) | 2e+05 (166250-245750) | 207050 (166000-257750) |
| ..... <150,000                 | 58 (17.9)              | 46 (14.5)             | 104 (16.2)             |
| ...ESR                         | 206 (100.0)            | 163 (100.0)           | 369 (100.0)            |
| .....                          | 47 (27-72)             | 25 (14-45)            | 37 (20-63)             |
| ..... >50                      | 93 (45.1)              | 33 (20.2)             | 126 (34.1)             |
| ...Creatinine                  | 323 (100.0)            | 329 (100.0)           | 652 (100.0)            |
| .....                          | 1 (1-1)                | 1 (1-1)               | 1 (1-1)                |
| ..... >1.20                    | 53 (16.4)              | 30 (9.1)              | 83 (12.7)              |
| ...Lactate dehydrogenase       | 314 (100.0)            | 249 (100.0)           | 563 (100.0)            |
| .....                          | 434 (321-650)          | 236 (171-327)         | 340 (228-532)          |
| ..... >400                     | 182 (58.0)             | 41 (16.5)             | 223 (39.6)             |
| ..... >600                     | 100 (31.8)             | 5 (2.0)               | 105 (18.7)             |
| ...C-reactive protein          | 177 (100.0)            | 265 (100.0)           | 442 (100.0)            |
| .....                          | 50 (13-113)            | 15 (5-42)             | 23 (7-73)              |
| ..... >10                      | 136 (76.8)             | 165 (62.3)            | 301 (68.1)             |
| ..... >60                      | 82 (46.3)              | 50 (18.9)             | 132 (29.9)             |
| ..... >100                     | 59 (33.3)              | 23 (8.7)              | 82 (18.6)              |
| ...Ferritin                    | 221 (100.0)            | 200 (100.0)           | 421 (100.0)            |
| .....                          | 612 (281-1607)         | 428 (200-907)         | 514 (231-1152)         |
| ..... >500                     | 125 (56.6)             | 92 (46.0)             | 217 (51.5)             |
| ..... >600                     | 112 (50.7)             | 80 (40.0)             | 192 (45.6)             |
| ...Bilirubin                   | 297 (100.0)            | 306 (100.0)           | 603 (100.0)            |
| .....                          | 1 (0-1)                | 0 (0-1)               | 0 (0-1)                |
| ...Alanine aminotransferase    | 324 (100.0)            | 307 (100.0)           | 631 (100.0)            |
| .....                          | 33 (20-58)             | 24 (15-40)            | 28 (17-48)             |
| ..... >41                      | 124 (38.3)             | 72 (23.5)             | 196 (31.1)             |
| ...Aspartate aminotransferase  | 322 (100.0)            | 307 (100.0)           | 629 (100.0)            |
| <- <-                          | 34 (23-52)             | 25 (19-35)            | 29 (21-44)             |
| ..... >40                      | 126 (39.1)             | 52 (16.9)             | 178 (28.3)             |
| ...Procalcitonin               | 0 (0.0)                | 6 (100.0)             | 6 (100.0)              |

|                                |            |             |             |
|--------------------------------|------------|-------------|-------------|
| <- <-                          | -          | 0 (0-0)     | 0 (0-0)     |
| ...D-dimer                     | 9 (100.0)  | 207 (100.0) | 216 (100.0) |
| .....                          | 1 (1-1)    | 0 (0-1)     | 0 (0-1)     |
| ...3 normal biomarkers         | 3 (0.9)    | 11 (3.2)    | 14 (2.1)    |
| Treatements [num. (%)]         | ...        | ...         | ...         |
| ...With hidroxychloroquine     | 5 (1.5)    | 13 (3.8)    | 18 (2.7)    |
| .....With IMV                  | 1 (20.0)   | 5 (38.5)    | 6 (33.3)    |
| .....deceased                  | 1 (20.0)   | 1 (7.7)     | 2 (11.1)    |
| ...Without hidroxychloroquine  | 321 (98.5) | 329 (96.2)  | 650 (97.3)  |
| .....With IMV                  | 31 (9.7)   | 12 (3.6)    | 43 (6.6)    |
| .....deceased                  | 62 (19.3)  | 19 (5.8)    | 81 (12.5)   |
| ...With lopinavir/ritonavir    | 8 (2.5)    | 11 (3.2)    | 19 (2.8)    |
| .....With IMV                  | 2 (25.0)   | 5 (45.5)    | 7 (36.8)    |
| .....deceased                  | 3 (37.5)   | 1 (9.1)     | 4 (21.1)    |
| ...Without lopinavir/ritonavir | 318 (97.5) | 331 (96.8)  | 649 (97.2)  |
| .....With IMV                  | 30 (9.4)   | 12 (3.6)    | 42 (6.5)    |
| .....deceased                  | 60 (18.9)  | 19 (5.7)    | 79 (12.2)   |
| ...With plasma                 | 35 (10.7)  | 10 (2.9)    | 45 (6.7)    |
| .....With IMV                  | 11 (31.4)  | 2 (20.0)    | 13 (28.9)   |
| .....deceased                  | 6 (17.1)   | 1 (10.0)    | 7 (15.6)    |
| ...Without plasma              | 291 (89.3) | 332 (97.1)  | 623 (93.3)  |
| .....With IMV                  | 21 (7.2)   | 15 (4.5)    | 36 (5.8)    |
| .....deceased                  | 57 (19.6)  | 19 (5.7)    | 76 (12.2)   |
| ...With azithromycin           | 225 (69.0) | 158 (46.2)  | 383 (57.3)  |
| .....With IMV                  | 22 (9.8)   | 10 (6.3)    | 32 (8.4)    |
| .....deceased                  | 40 (17.8)  | 7 (4.4)     | 47 (12.3)   |
| ...Without azithromycin        | 101 (31.0) | 184 (53.8)  | 285 (42.7)  |
| .....With IMV                  | 10 (9.9)   | 7 (3.8)     | 17 (6.0)    |
| .....deceased                  | 23 (22.8)  | 13 (7.1)    | 36 (12.6)   |
| ...With steroids               | 114 (35.0) | 86 (25.1)   | 200 (29.9)  |
| .....With IMV                  | 24 (21.1)  | 12 (14.0)   | 36 (18.0)   |
| .....deceased                  | 33 (28.9)  | 10 (11.6)   | 43 (21.5)   |
| ...Without steroids            | 212 (65.0) | 256 (74.9)  | 468 (70.1)  |
| .....With IMV                  | 8 (3.8)    | 5 (2.0)     | 13 (2.8)    |
| .....deceased                  | 30 (14.2)  | 10 (3.9)    | 40 (8.5)    |
| Evolution [num. (%)]           | ...        | ...         | ...         |
| ...Temperature >38             | 27 (8.3)   | 52 (15.2)   | 79 (11.8)   |
| ...RR >30?                     | 47 (14.4)  | 15 (4.4)    | 62 (9.3)    |
| <- SAT <93?                    | 101 (31.0) | 51 (14.9)   | 152 (22.8)  |
| ...IMV                         | 32 (9.8)   | 17 (5.0)    | 49 (7.3)    |
| ...NIV                         | 0 (0.0)    | 3 (0.9)     | 3 (0.4)     |
| ...infiltrados <48 hs          | 21 (6.4)   | 13 (3.8)    | 34 (5.1)    |
| ...Altered conciousness        | 15 (4.6)   | 1 (0.3)     | 16 (2.4)    |
| ...Hemodynamic instability     | 17 (5.2)   | 5 (1.5)     | 22 (3.3)    |
| ...CURB >=2                    | 6 (1.8)    | 7 (2.0)     | 13 (1.9)    |
| ...ICU admission               | 50 (15.3)  | 27 (7.9)    | 77 (11.5)   |
| ...IMV prone position          | 17 (5.2)   | 4 (1.2)     | 21 (3.1)    |
| ...Haemodialysis               | 0 (0.0)    | 0 (0.0)     | 0 (0.0)     |
| ...Arrhythmia                  | 4 (1.2)    | 0 (0.0)     | 4 (0.6)     |
| ...Myocarditis/IM              | 0 (0.0)    | 0 (0.0)     | 0 (0.0)     |
| ...Inotropic agents            | 16 (4.9)   | 2 (0.6)     | 18 (2.7)    |
